# Supplementary material for: Stability and activity of titanium oxynitride thin films for the electrocatalytic reduction of nitrogen to ammonia at different pH values
Source: Royal Society of Chemistry journal article supplement (doi:10.1039/d3cp01330h), 2023-01-01
Supplement: d3cp01330h1.pdf [file d3cp01330h1.pdf]

## **Supporting Information**

### **Stability and Activity of Titanium Oxynitride Thin Films for the Electrocatalytic Reduction of Molecular Nitrogen to Ammonia at Different pH Values**

Precious Chukwunenyé, Ashwin Ganesan, Mojgan Gharaee, Kabirat Balogun, Qasim Adesope, Stella Chineló Amagbor, Teresa D. Golden, Francis D'Souza, Thomas R. Cundari, and Jeffrey A. Kelber

Department of Chemistry, University of North Texas, 1155 Union Circle, #305070, Denton, TX 76203-5017, USA.

## Table of Contents

1. Figure S1: In-situ AES spectra of TiN sample after deposition, subsequent oxygen exposure and ambient exposure.
2. Figure S2: SEM-EDX of (a) TiN and (b) TiON sample.
3. Figure S3: Overlaid GIXRD of plain FTO and titanium oxynitride.
4. Figure S4: (a) LSV curves of (i) bare FTO and (ii) TiON sample (b) absorbance before and after electrolysis for the detection of ammonia in N<sub>2</sub> saturated solution of 0.1 M Na<sub>2</sub>SO<sub>4</sub> solution at pH 7. *In-situ* AES composition of the film was TiO<sub>0.9</sub>N<sub>0.8</sub> before ambient exposure (c) LSV curves of (i) bare FTO and (ii) TiON sample. (d) absorbance before and after electrolysis for the detection of ammonia in N<sub>2</sub> saturated solution in 0.1 M Na<sub>2</sub>SO<sub>4</sub> solution at pH 10. *In-situ* AES composition of the film was TiO<sub>0.9</sub>N<sub>0.7</sub> before ambient exposure.
5. Figure S5: Gas chromatogram of TiON film in (a) pH 7 and (b) pH 10 during electrolysis for the detection of H<sub>2</sub> in N<sub>2</sub> environment in 0.1M Na<sub>2</sub>SO<sub>4</sub> solution.
6. Figure S6: *Ex-situ* XPS core level spectra of a TiON sample (a) before and (b) after 4.5 hr multicyclic voltammograms at -0.93 V in N<sub>2</sub> environment in 0.1 M Na<sub>2</sub>SO<sub>4</sub> solution at pH 3.2.

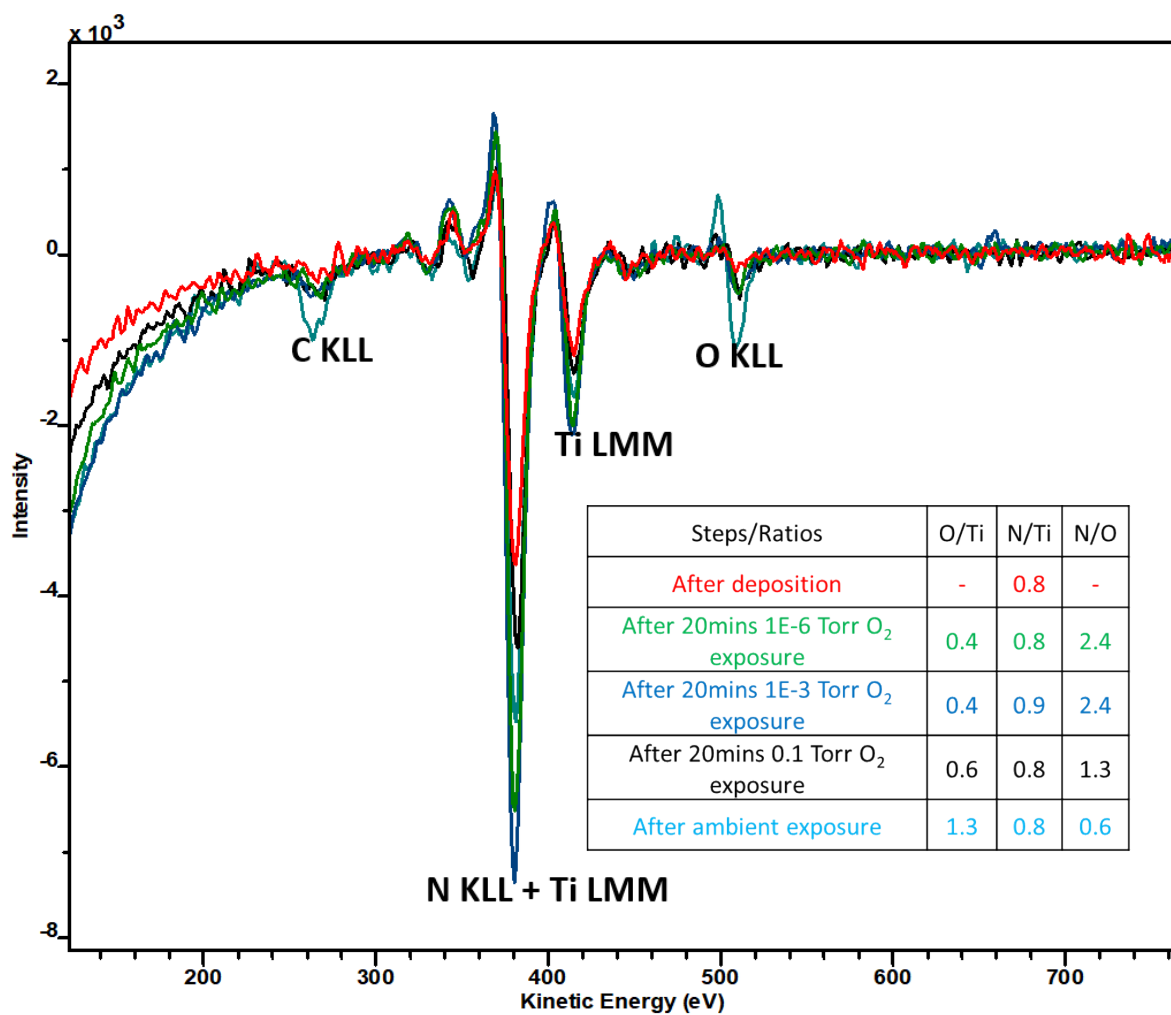

Figure S1: In-situ AES spectra of TiN sample after deposition, subsequent oxygen exposure and ambient exposure.

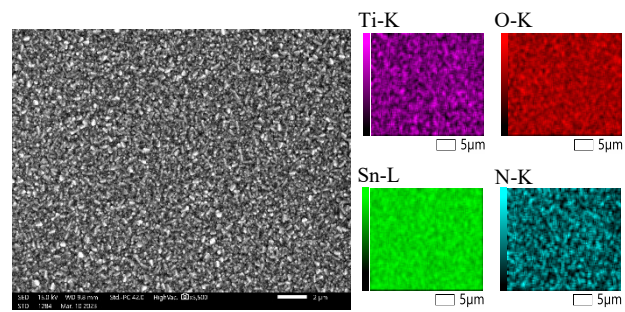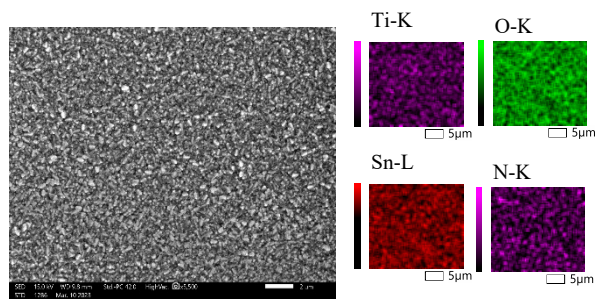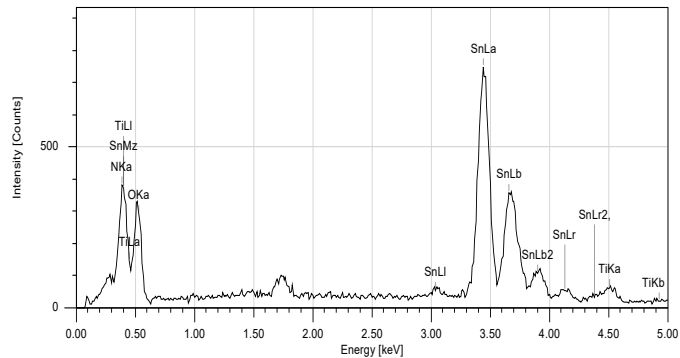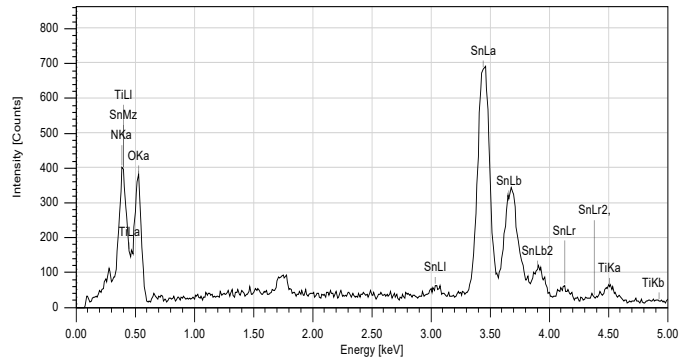

Figure S2: SEM-EDX of (a) TiN and (b) TiON sample.

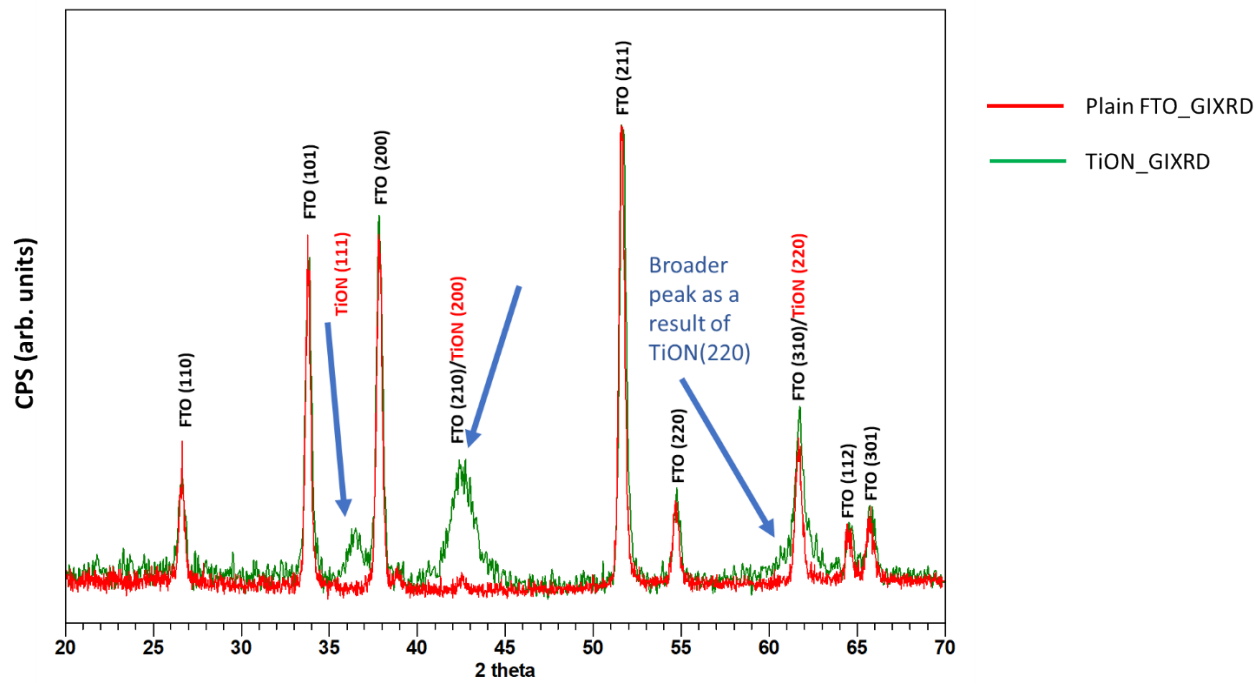

Figure S3: Overlaid grazing incidence XRD of plain FTO and titanium oxynitride.

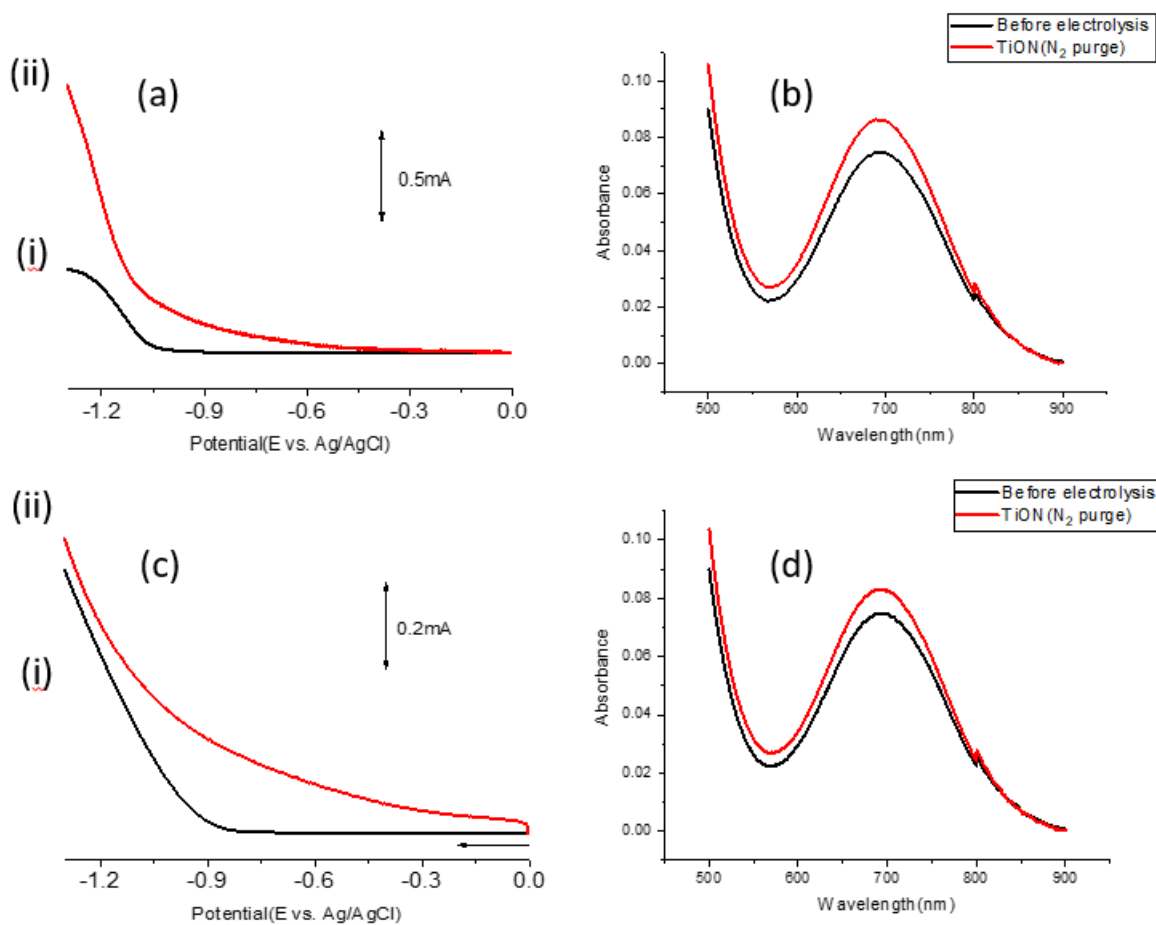

Figure S4: (a) LSV curves of (i) bare FTO and (ii) TiON sample (b) absorbance before and after electrolysis for the detection of ammonia in  $N_2$  saturated solution of  $0.1 M Na_2SO_4$  solution at pH 7. In-situ AES N:O atomic ratio of film was 0.9 before ambient exposure (c) LSV curves of (i) bare FTO and (ii) TiON sample. (d) absorbance before and after electrolysis for the detection of ammonia in  $N_2$  saturated solution in  $0.1 M Na_2SO_4$  solution at pH 10. In-situ AES N:O atomic ratio composition of film was 0.8 before ambient exposure.

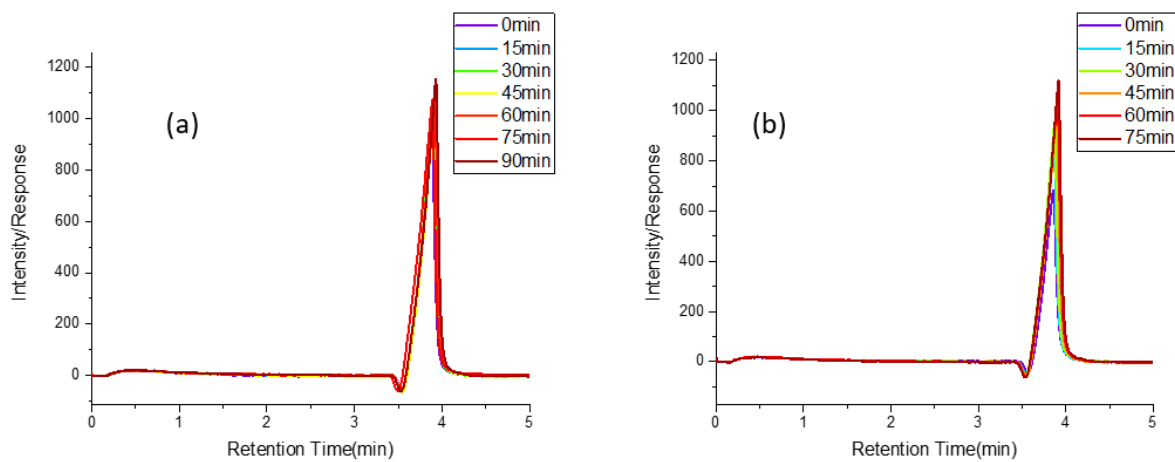

Figure S5: Gas chromatogram of TiON film in (a) pH 7 and (b) pH 10 during electrolysis for the detection of  $H_2$  in  $N_2$  environment in 0.1 M  $Na_2SO_4$  solution.

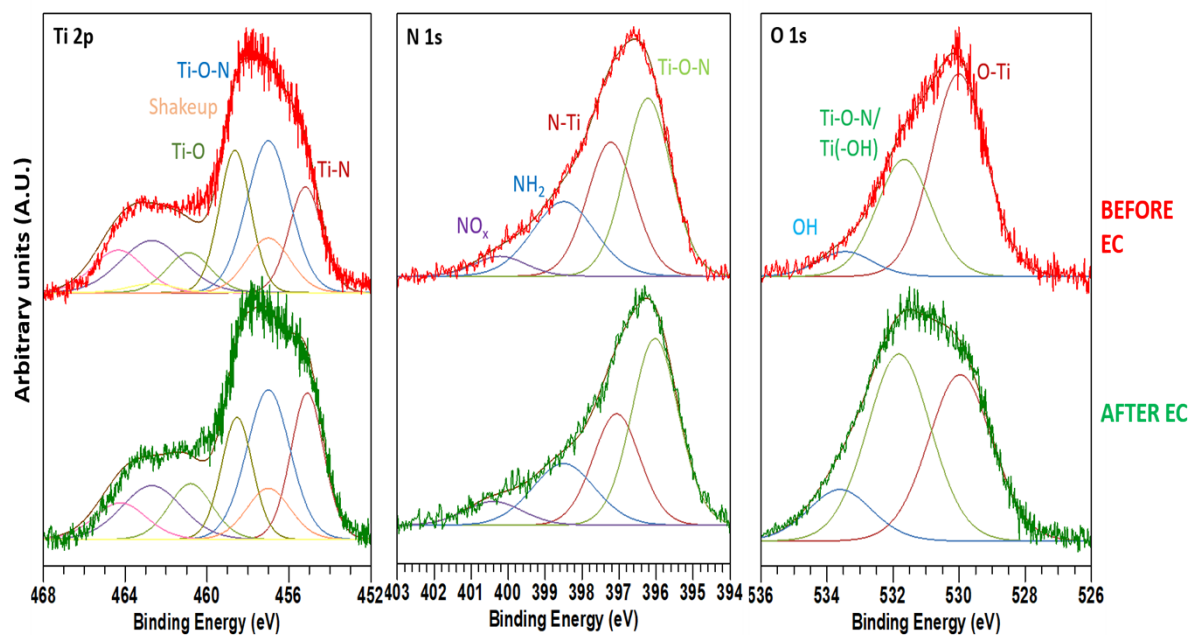

Figure S6: Ex-situ XPS core level spectra of a TiON sample (a) before and (b) after 4.5 hr multicyclic voltammograms at  $-0.93$  V in  $N_2$  environment in  $0.1$  M  $Na_2SO_4$  solution at pH 3.2. XPS-derived N:O ratios were 0.8 prior to and 0.4 after electrochemical cycling, respectively.



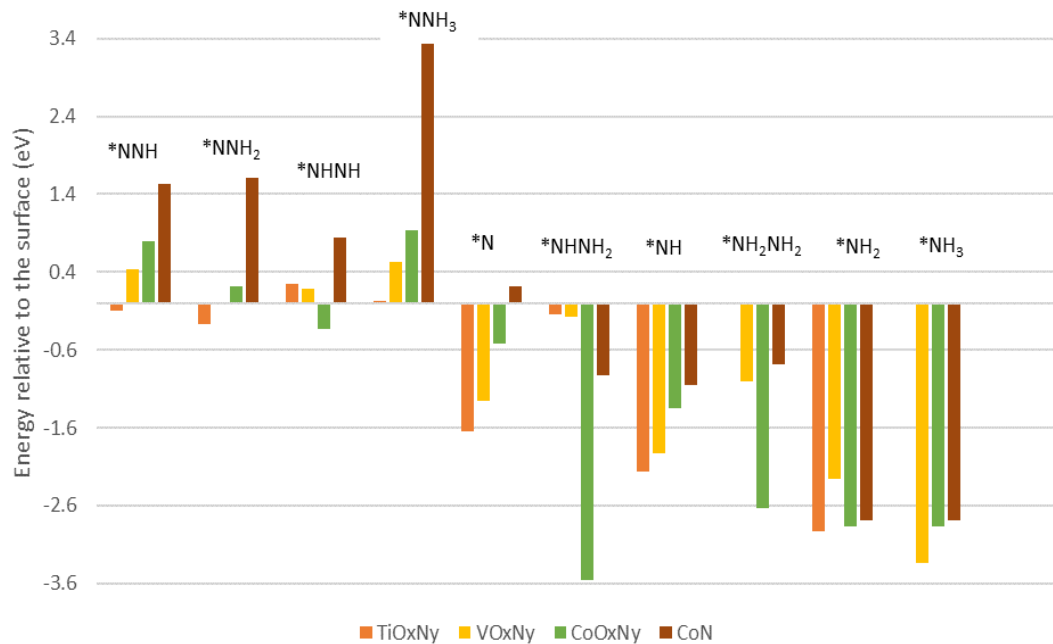

Figure S7: Energy calculation reaction (in eV) of  $*N_aH_b$  surface intermediates for  $rs\text{-TiO}_xN_y$  (orange color),  $rs\text{-VO}_xN_y$  (yellow color),  $zb\text{-CoO}_xN_y$  (green color) and  $zb\text{-CoN}$  (red color) models
